# Supplementary material for: Mg-doped cathodic properties and solid-state ionic conduction in P2-type layered material for Na-ion batteries and supercapacitors
Source: Royal Society of Chemistry journal article supplement (doi:10.1039/d3nj04685k), 2024-01-01
Supplement: d3nj04685k1.pdf [file d3nj04685k1.pdf]

## Supporting Information

# Mg-doped cathodic properties and solid state ionic conduction in P2-Type layered material for Na-ion batteries and supercapacitors

Rachita Panigrahi and Bhabani S. Mallik\*

Department of Chemistry, Indian Institute of Technology Hyderabad, Sangareddy  
- 502285, Telangana, India

\*Corresponding author: [bhabani@chy.iith.ac.in](mailto:bhabani@chy.iith.ac.in)

**Table S1.** Buckingham Potential parameter used in this study for  $\text{Na}_{0.67}\text{MnO}_2$  and  $\text{Na}_{0.67}\text{Mn}_{0.9}\text{Mg}_{0.1}\text{O}_2$ . for two-body interactions can be written as,  $\phi_{ij}^{(rij)} = A_{ij} \exp\left(\frac{-r_{ij}}{\rho_{ij}}\right) - \frac{C_{ij}}{r_{ij}^6}$ , where A is energy in eV and  $\rho$  is the distance between the pair of atoms. These parameters should be adopted purposefully to replicate the experimental data.

| Interaction                      | A (eV)  | $\rho$ (Å) | C (eV Å <sup>-6</sup> ) |
|----------------------------------|---------|------------|-------------------------|
| $\text{Na}^{2+} - \text{O}^{2-}$ | 1226.84 | 0.3065     | 0.000                   |
| $\text{Mn}^{3+} - \text{O}^{2-}$ | 1267.5  | 0.3214     | 0.00                    |
| $\text{Mg}^{2+} - \text{O}^{2-}$ | 946.627 | 0.318      | 0.00                    |
| $\text{O}^{2-} - \text{O}^{2-}$  | 22764.3 | 0.149      | 27.88                   |

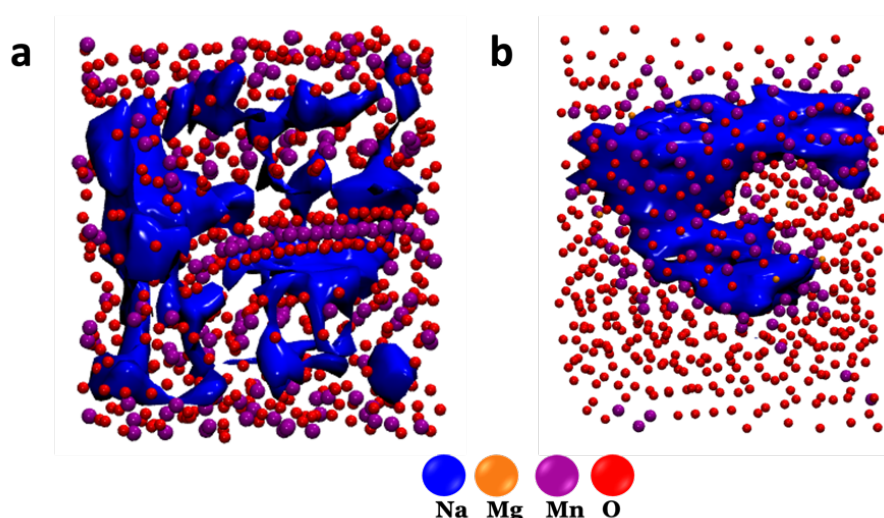

**Figure S1.** The reference position  $r_i(o)$  for (a)  $\text{Na}_{0.67}\text{MnO}_2$ , (b)  $\text{Na}_{0.67}\text{Mn}_{0.9}\text{Mg}_{0.1}\text{O}_2$  at 600 K.

We conducted an equilibration run of 20 ns with 1 fs timestep at 300 K for  $\text{Na}_{0.67}\text{MnO}_2$ , desodiated  $\text{MnO}_2$ ,  $\text{Na}_{0.67}\text{Mn}_{0.9}\text{Mg}_{0.1}\text{O}_2$ , and desodiated  $\text{Mn}_{0.9}\text{Mg}_{0.1}\text{O}_2$  to verify the structural stability dynamically. We reported the temperature and energy changes during the simulation period for the aforementioned system in Figure S2. We analyzed that during the sodiation and desodiation process in  $\text{Na}_{0.67}\text{MnO}_2$ , the structure is highly destabilized at the end of fully discharged. But in  $\text{Na}_{0.67}\text{Mn}_{0.9}\text{Mg}_{0.1}\text{O}_2$ , it is less destabilized compared to  $\text{Na}_{0.67}\text{MnO}_2$ . We hope that at higher temperatures, it will be stabilized during full discharge.

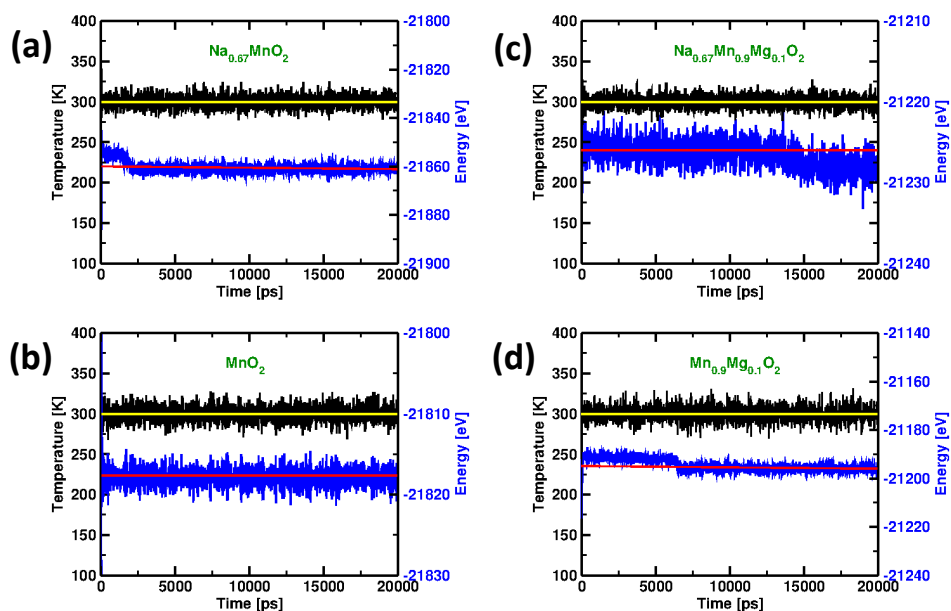

**Figure S2.** The fluctuation of temperature and energy during MD simulation at 300 K of (a)  $\text{Na}_{0.67}\text{MnO}_2$ , (c)  $\text{Na}_{0.67}\text{Mn}_{0.9}\text{Mg}_{0.1}\text{O}_2$  and their respective desodiated materials in (b), (d).

In Figure S3, we additionally present the variation in bond length between Na-O and Mn-O in sodiated materials and just Mn-O in desodiated materials. The Na-O bond fluctuated more in the Mg-doped material during the simulation than in the undoped one. The bond strength of Na-O is reduced in  $\text{Na}_{0.67}\text{Mn}_{0.9}\text{Mg}_{0.1}\text{O}_2$ , which allows for easier Na-ion diffusion.

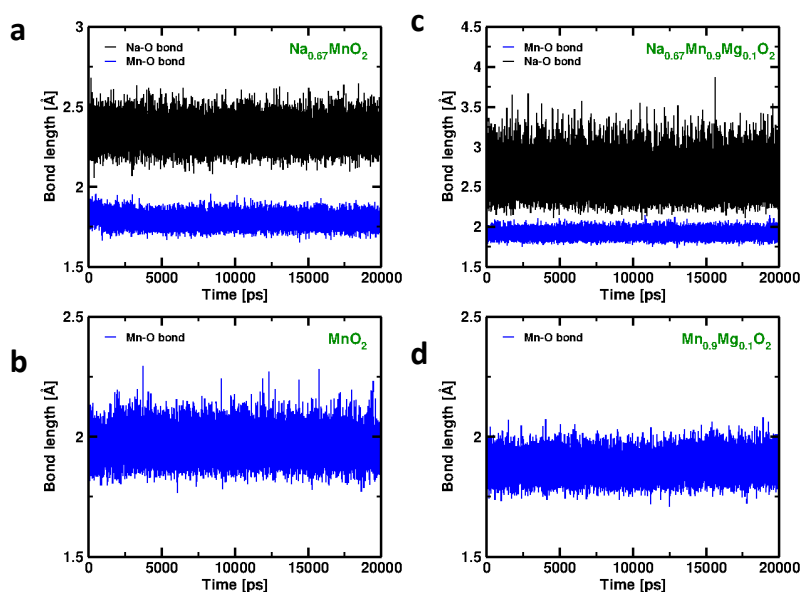

**Figure S3.** The fluctuation of bond length of both Mn-O and Na-O during MD simulation at 300 K of (a)  $\text{Na}_{0.67}\text{MnO}_2$ , (c)  $\text{Na}_{0.67}\text{Mn}_{0.9}\text{Mg}_{0.1}\text{O}_2$  and only Mn-O bond length in their respective desodiated materials in (b), (d).

**Table S2.** The optimized coordinate file in POSCAR format for  $\text{Na}_{0.67}\text{MnO}_2$

```

Na0.67MnO2
1.0000000000000000
 8.6070003509999999  0.0000000000000000  0.0000000000000000
-2.8689999579999999  4.9692536941999998  0.0000000000000000
 0.0000000000000000  0.0000000000000000  11.2480001450000007
Na Mn O
 24 12 24
Direct
0.0000190152976437  0.0000143868136168  0.2500000000000000
-0.0000190152976437 -0.0000143868136169  0.7500000000000000
0.0000190152976437  0.5000143868136169  0.2500000000000000
-0.0000190152976437  0.4999856131863832  0.7500000000000000
0.6666857022976467  0.5000143868136169  0.2500000000000000
0.3333143277023559  0.4999856131863832  0.7500000000000000
0.3333523582976434  0.0000143868136168  0.2500000000000000
0.6666476717023591 -0.0000143868136169  0.7500000000000000
0.3333143277023559 -0.0000143868136169  0.7500000000000000
0.6666857022976467  0.0000143868136168  0.2500000000000000
0.6666476717023591  0.4999856131863832  0.7500000000000000
0.3333523582976434  0.5000143868136169  0.2500000000000000
0.1110694513598542  0.3332759667266877  0.2500000000000000
0.8889305566401464  0.6667240032733097  0.7500000000000000
0.7777361303598493  0.8332759367266853  0.2500000000000000
0.2222638846401484  0.1667240482733099  0.7500000000000000
0.1110694583598512  0.8332759367266853  0.2500000000000000
0.8889305566401464  0.1667240482733099  0.7500000000000000
0.4444027873598497  0.3332759367266853  0.2500000000000000
0.5555972426401456  0.6667240632733147  0.7500000000000000
0.4444027873598497  0.8332759367266853  0.2500000000000000
0.5555971826401478  0.1667240482733099  0.7500000000000000
0.7777361303598493  0.3332759367266853  0.2500000000000000
0.2222638846401484  0.6667240632733147  0.7500000000000000
-0.0000000000000000 -0.0000000000000000  0.0000000000000000
-0.0000000000000000 -0.0000000000000000  0.5000000000000000
-0.0000000000000000  0.5000000000000000  0.0000000000000000
0.6666666870000029  0.5000000000000000  0.0000000000000000
0.3333333429999996  0.5000000000000000  0.0000000000000000
0.3333333429999996 -0.0000000000000000  0.0000000000000000
0.6666666870000029 -0.0000000000000000  0.0000000000000000
-0.0000000000000000  0.5000000000000000  0.5000000000000000
0.3333333429999996  0.5000000000000000  0.5000000000000000
0.6666666870000029  0.5000000000000000  0.5000000000000000
0.6666666870000029 -0.0000000000000000  0.5000000000000000
0.3333333429999996 -0.0000000000000000  0.5000000000000000
0.1111068213039541  0.3333221903658785  0.0836363818588604
0.8888931866960467  0.666677796341189  0.9163635881411443
0.777735003039491  0.8333221603658761  0.0836363818588604

```

0.2222265146960485 0.1666778246341191 0.9163635881411443  
 0.1111068283039511 0.8333221603658761 0.0836363818588604  
 0.8888931866960467 0.1666778246341191 0.9163635881411443  
 0.8888931866960467 0.6666777796341189 0.5836364118588557  
 0.1111068213039541 0.3333221903658785 0.4163636181411396  
 0.2222265146960485 0.1666778246341191 0.5836364118588557  
 0.7777735003039491 0.8333221603658761 0.4163636181411396  
 0.8888931866960467 0.1666778246341191 0.5836364118588557  
 0.1111068283039511 0.8333221603658761 0.4163636181411396  
 0.4444401573039495 0.3333221603658760 0.0836363818588604  
 0.5555598726960459 0.6666778396341239 0.9163635881411443  
 0.4444401573039495 0.8333221603658761 0.0836363818588604  
 0.5555598126960480 0.1666778246341191 0.9163635881411443  
 0.5555598726960459 0.6666778396341239 0.5836364118588557  
 0.4444401573039495 0.3333221603658760 0.4163636181411396  
 0.5555598126960480 0.1666778246341191 0.5836364118588557  
 0.4444401573039495 0.8333221603658761 0.4163636181411396  
 0.7777735003039491 0.3333221603658760 0.0836363818588604  
 0.2222265146960485 0.6666778396341239 0.9163635881411443  
 0.2222265146960485 0.6666778396341239 0.5836364118588557  
 0.7777735003039491 0.3333221603658760 0.4163636181411396

**Table S3.** The optimized coordinate file in POSCAR format for  $\text{Na}_{0.66}\text{Mg}_{0.1}\text{Mn}_{0.9}\text{O}_2$

```

Na0.66Mg0.1Mn0.9O2
1.0000000000000000
 8.6070003509999999 0.0000000000000000 0.0000000000000000
-4.3035001755000000 7.4538809542999998 0.0000000000000000
 0.0000000000000000 0.0000000000000000 11.2480001450000007
Na Mn O Mg
36 16 36 2
Direct
0.0000000000000000 -0.0000000000000000 0.1918820794801227
-0.0000000000000000 -0.0000000000000000 0.8081179205198775
0.9537101576314356 0.2889203489533113 0.2542541558374678
0.0462898423685642 0.7110796810466838 0.7457458441625321
0.7110796810466838 0.6647898386781196 0.2542541558374678
0.2889203489533113 0.3352101913218827 0.7457458441625321
0.3352101913218827 0.0462898423685642 0.2542541558374678
0.6647898386781196 0.9537101576314356 0.7457458441625321
0.2889203489533113 0.9537101576314356 0.7457458441625321
0.7110796810466838 0.0462898423685642 0.2542541558374678
0.6647898386781196 0.7110796810466838 0.7457458441625321
0.3352101913218827 0.2889203489533113 0.2542541558374678
0.0462898423685642 0.3352101913218827 0.7457458441625321
0.9537101576314356 0.6647898386781196 0.2542541558374678
0.3333333429999996 0.6666666870000029 0.9942190188485777
0.6666666870000029 0.3333333429999996 0.0057809811514225
0.6666666870000029 0.3333333429999996 0.4969905130426360
0.3333333429999996 0.6666666870000029 0.5030094869573638
0.2555818941555486 0.5111637883110900 0.1355272771570427
0.7444181138444520 0.4888362266889077 0.8644727228429573
0.4888362266889077 0.7444181138444520 0.1355272771570427
0.5111637883110900 0.2555818941555486 0.8644727228429573
  
```

0.2555818941555486 0.7444181138444520 0.1355272771570427  
0.7444181138444520 0.2555818941555486 0.8644727228429573  
0.0924245434067881 0.5462122977033963 0.2390327323339791  
0.9075754645932124 0.4537877322965991 0.7609672676660210  
0.4537877322965991 0.5462122977033963 0.2390327323339791  
0.5462122977033963 0.4537877322965991 0.7609672676660210  
0.4537877322965991 0.9075754645932124 0.2390327323339791  
0.5462122977033963 0.0924245434067881 0.7609672676660210  
0.4200679094684804 0.2100339547342295 0.3810856732356543  
0.5799321205315153 0.7899660602657682 0.6189143267643458  
0.7899660602657682 0.2100339547342295 0.3810856732356543  
0.2100339547342295 0.7899660602657682 0.6189143267643458  
0.7899660602657682 0.5799321205315153 0.3810856732356543  
0.2100339547342295 0.4200679094684804 0.6189143267643458  
0.0000000000000000 -0.0000000000000000 -0.0000000000000000  
-0.0000000000000000 -0.0000000000000000 0.5000000000000000  
-0.0000000000000000 0.3928199498499562 -0.0000000000000000  
0.0000000000000000 0.6071800801500462 -0.0000000000000000  
0.6071800801500462 0.6071800801500462 -0.0000000000000000  
0.3928199498499562 0.3928199498499562 -0.0000000000000000  
0.3928199498499562 -0.0000000000000000 -0.0000000000000000  
0.6071800801500462 -0.0000000000000000 -0.0000000000000000  
0.0000000000000000 0.7466518343148210 0.5000000000000000  
0.0000000000000000 0.2533481956851816 0.5000000000000000  
0.2533481956851816 0.2533481956851816 0.5000000000000000  
0.7466518343148210 0.7466518343148210 0.5000000000000000  
0.7466518343148210 -0.0000000000000000 0.5000000000000000  
0.2533481956851816 -0.0000000000000000 0.5000000000000000  
0.3333333429999996 0.6666666870000029 0.7107275572617282  
0.6666666870000029 0.3333333429999996 0.2892724427382724  
0.1280445012334300 0.2560890024668671 0.1155064446342390  
0.8719555067665706 0.7439110125331307 0.8844935253657658  
0.7439110125331307 0.8719555067665706 0.1155064446342390  
0.2560890024668671 0.1280445012334300 0.8844935253657658  
0.1280445012334300 0.8719555067665706 0.1155064446342390  
0.8719555067665706 0.1280445012334300 0.8844935253657658  
0.9104543213625584 0.8209086417251271 0.6619300674716546  
0.0895456866374424 0.1790913732748707 0.3380699625283405  
0.1790913732748707 0.0895456866374424 0.6619300674716546  
0.8209086417251271 0.9104543213625584 0.3380699625283405  
0.9104543213625584 0.0895456866374424 0.6619300674716546  
0.0895456866374424 0.9104543213625584 0.3380699625283405  
0.8509280033598658 0.4254640276799244 0.1448219314168094  
0.1490720046401350 0.5745360023200641 0.8551780385831950  
0.5745360023200641 0.4254640276799244 0.1448219314168094  
0.4254640276799244 0.5745360023200641 0.8551780385831950  
0.5745360023200641 0.1490720046401350 0.1448219314168094  
0.4254640276799244 0.8509280033598730 0.8551780385831950  
0.0420064354849441 0.5210032177424722 0.5846667581587118  
0.9579935725150567 0.4789968122575234 0.4153332718412835  
0.4789968122575234 0.5210032177424722 0.5846667581587118  
0.5210032177424722 0.4789968122575234 0.4153332718412835  
0.4789968122575234 0.9579935725150567 0.5846667581587118

0.5210032177424722 0.0420064354849441 0.4153332718412835  
0.3085335867500518 0.1542667933750295 0.0841206950091982  
0.6914664432499436 0.8457332216249680 0.9158792749908063  
0.8457332216249680 0.1542667933750295 0.0841206950091982  
0.1542667933750295 0.8457332216249680 0.9158792749908063  
0.8457332216249680 0.6914664432499436 0.0841206950091982  
0.1542667933750295 0.3085335867500518 0.9158792749908063  
0.5407048876046405 0.7703524438023275 0.3870712586542486  
0.4592951423953546 0.2296475711976702 0.6129287713457467  
0.2296475711976702 0.7703524438023275 0.3870712586542486  
0.7703524438023275 0.2296475711976702 0.6129287713457467  
0.2296475711976702 0.4592951423953546 0.3870712586542486  
0.7703524438023275 0.5407048876046405 0.6129287713457467  
0.6666669849999991 0.3333333429999996 0.7039461696478342  
0.3333333429999996 0.6666666870000029 0.2960538303521659
